# Supplementary material
Source: PubMed Central journal article supplement (PMC8367597)
Supplement: 1685.pdf [file 1685.pdf]

**Supplemental data table 1. Models of the scanners used in this study and the effect of scanner model on algorithm performance.**

| Scanner model          | Count | %   | Aidoc<br>incorrect | %   | <i>p</i> -value |
|------------------------|-------|-----|--------------------|-----|-----------------|
| Total                  | 1904  | 100 | 161                | 100 | 0.82            |
| GE Revolution HD       | 1131  | 59  | 101                | 63  |                 |
| GE Revolution Evo      | 256   | 13  | 23                 | 14  |                 |
| GE Revolution Frontier | 173   | 9   | 14                 | 9   |                 |
| GE Discovery CT750     | 148   | 8   | 9                  | 6   |                 |
| GE Optima CT660        | 122   | 6   | 10                 | 6   |                 |
| GE Revolution CT       | 48    | 3   | 2                  | 1   |                 |
| GE Optima CT580        | 16    | 1   | 1                  | 1   |                 |
| GE Lightspeed VCT      | 6     | 0   | 0                  | 0   |                 |
| GE Discovery STE       | 4     | 0   | 1                  | 1   |                 |

**Supplemental data table 2. Fracture characteristics and Aidoc performance.**

| Factor                     | All fractures |    |                 |    |                             | Acute fractures |    |                 |     |                             |
|----------------------------|---------------|----|-----------------|----|-----------------------------|-----------------|----|-----------------|-----|-----------------------------|
|                            | Count         | %  | Aidoc incorrect | %  | <i>P</i> value <sup>1</sup> | Count           | %  | Aidoc incorrect | %   | <i>P</i> value <sup>2</sup> |
| <b>Chronicity</b>          | <b>122</b>    |    | <b>55</b>       |    | <b>0.002</b>                |                 |    | <b>17</b>       |     |                             |
| Acute                      | 63            | 52 | 17              | 31 |                             |                 |    | 17              | 100 |                             |
| Non-acute                  | 58            | 48 | 38              | 70 |                             |                 |    |                 |     |                             |
| Chronic                    | 51            |    |                 |    |                             |                 |    |                 |     |                             |
| Indeterminate              | 7             |    |                 |    |                             |                 |    |                 |     |                             |
| Mixed                      | 1             |    |                 |    |                             |                 |    |                 |     |                             |
| <b>Number of fractures</b> | <b>122</b>    |    | <b>55</b>       |    | <b>0.99</b>                 | <b>63</b>       |    | <b>17</b>       |     | <b>0.73</b>                 |
| Single                     | 91            | 75 | 41              | 75 |                             | 42.0            | 67 | 12              | 71  |                             |
| Multiple                   | 31            | 25 | 14              | 25 |                             | 21.0            | 67 | 5               | 29  |                             |
| <b>Vertebrae</b>           | <b>164</b>    |    | <b>76</b>       |    | <b>0.24</b>                 | <b>63</b>       |    | <b>26</b>       |     | <b>0.21</b>                 |
| C1                         | 14            | 9  | 6               | 8  |                             | 8               | 13 | 3               | 12  |                             |
| C2                         | 32            | 20 | 7               | 9  |                             | 20              | 32 | 2               | 8   |                             |
| C3                         | 12            | 7  | 5               | 7  |                             | 3               | 5  | 2               | 8   |                             |
| C4                         | 22            | 13 | 10              | 13 |                             | 5               | 8  | 2               | 8   |                             |
| C5                         | 22            | 13 | 16              | 21 |                             | 6               | 10 | 4               | 15  |                             |
| C6                         | 26            | 16 | 14              | 18 |                             | 7               | 11 | 4               | 15  |                             |
| C7                         | 36            | 22 | 18              | 24 |                             | 14              | 22 | 9               | 35  |                             |
| <b>Fracture location</b>   | <b>164</b>    |    | <b>76</b>       |    | <b>0.002</b>                | <b>63</b>       |    | <b>17</b>       |     | <b>0.12</b>                 |
| Osteophyte                 | 35            | 21 | 26              | 34 |                             | 1               | 2  | 1               | 6   |                             |
| Vertebral body             | 24            | 15 | 19              | 25 |                             | 3               | 5  | 0               | 0   |                             |
| Transverse process         | 15            | 9  | 9               | 12 |                             | 7               | 11 | 3               | 18  |                             |
| Articular process          | 14            | 9  | 4               | 5  |                             | 7               | 11 | 1               | 6   |                             |
| Dens                       | 14            | 9  | 0               | 0  |                             | 10              | 16 | 0               | 0   |                             |
| Spinous process            | 9             | 5  | 1               | 1  |                             | 4               | 6  | 1               | 6   |                             |
| Lateral mass               | 4             | 2  | 2               | 3  |                             | 2               | 3  | 1               | 6   |                             |
| Posterior arch             | 4             | 2  | 2               | 3  |                             | 2               | 3  | 0               | 0   |                             |
| Lamina                     | 3             | 2  | 0               | 0  |                             | 1               | 2  | 0               | 0   |                             |
| Transverse foramen         | 3             | 2  | 3               | 4  |                             | 3               | 5  | 3               | 18  |                             |
| Anterior arch              | 2             | 1  | 2               | 3  |                             | 2               | 3  | 2               | 12  |                             |
| Pedicel                    | 1             | 1  | 0               | 0  |                             | 0               | 0  | 0               | 0   |                             |
| Multiple structures        | 36            | 22 | 8               | 11 |                             | 21              | 33 | 5               | 29  |                             |
| Transverse foramen         | 8             | 5  | 3               | 4  |                             | 14              | 22 | 2               | 12  |                             |
| No transverse foramen      | 28            | 17 | 5               | 7  |                             | 7               | 11 | 3               | 18  |                             |

1: Chi-squared test comparing Aidoc false negatives to all fractures.

2: Chi-squared test comparing Aidoc acute fracture false negatives to all acute fractures.
